# Supplementary material for: Facile preparation and multifunctional applications of boron nitride quantum dots
Source: Royal Society of Chemistry journal article supplement (doi:10.1039/c5nr05960g), 2015-01-01
Supplement: c5nr05960g1.pdf [file c5nr05960g1.pdf]

## Supporting Information

# Facile Preparation and Multifunctional Applications of Boron Nitride Quantum Dots

*Zhouyue Lei†, Shengjie Xu†, Jiaxun Wan and Peiyi Wu\**

State Key Laboratory of Molecular Engineering of Polymers, Collaborative  
Innovation Center of Polymers and Polymer Composite Materials, Department of  
Macromolecular Science and Laboratory for Advanced Materials, Fudan University,  
Shanghai 200433, China.

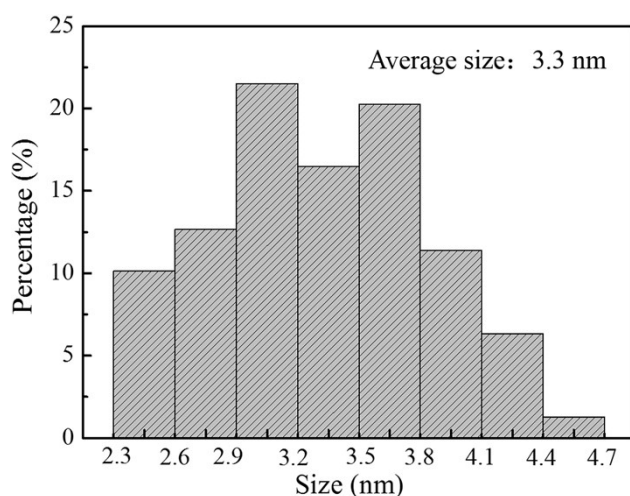

**Fig. S1** The size distribution of the BN QDs.

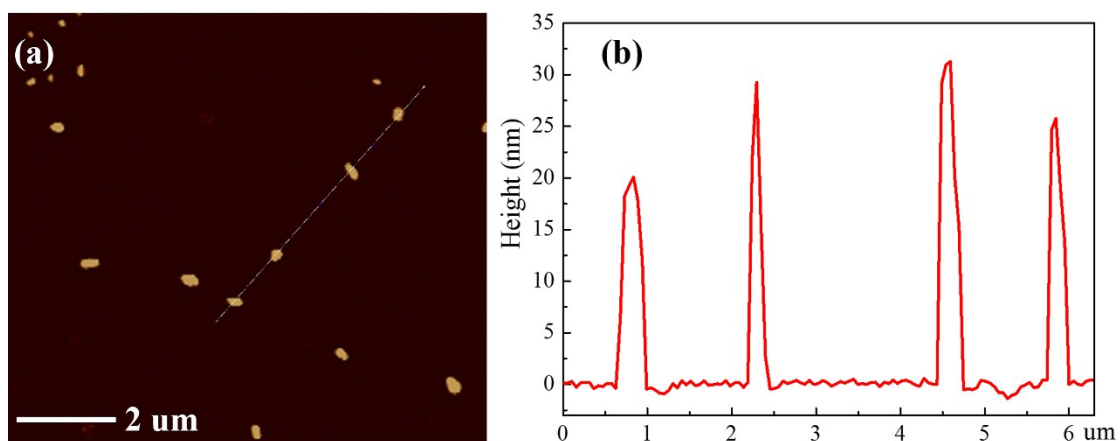

**Fig. S2** AFM images of BN nanosheets prepared by the sonication treatment of bulk BN flakes in DMF for 8 h.

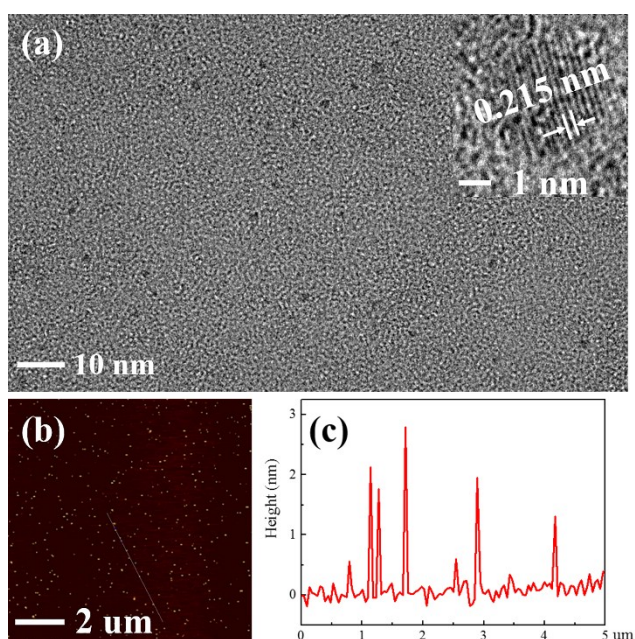

**Fig. S3** A typical TEM image (a) and AFM image (b) of the BN QDs prepared by the sonication and solvothermal treatment of the bulk BN flakes in DMSO, and the height profile of the as-prepared BN QDs (c). Inset of (a): the HRTEM image of the BN QDs.

**Table S1** The concentration of BN nanosheets and BN QDs in DMF and DMSO after different sonication time (centrifugated at 5000 rpm).

| 8 h  | BN nanosheets<br>(mg/mL) | BN QDs<br>(mg/mL) | 48 h | BN nanosheets<br>(mg/mL) | BN QDs<br>(mg/mL) |
|------|--------------------------|-------------------|------|--------------------------|-------------------|
| DMF  | 0.034                    | 0.005             | DMF  | 0.059                    | 0.017             |
| DMSO | 0.076                    | 0.011             | DMSO | 0.097                    | 0.030             |

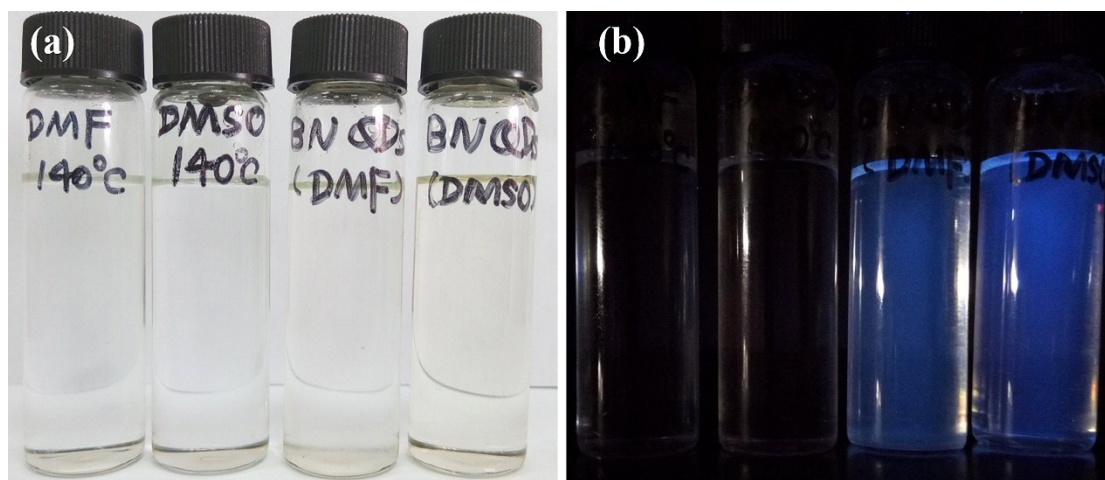

**Fig. S4** Typical digital photographs of DMF, DMSO, DMF with the addition of BN raw materials and DMSO with the addition of BN raw materials in natural light (a) and under 365 nm UV radiation (b) after the same sonication-solvothermal process.

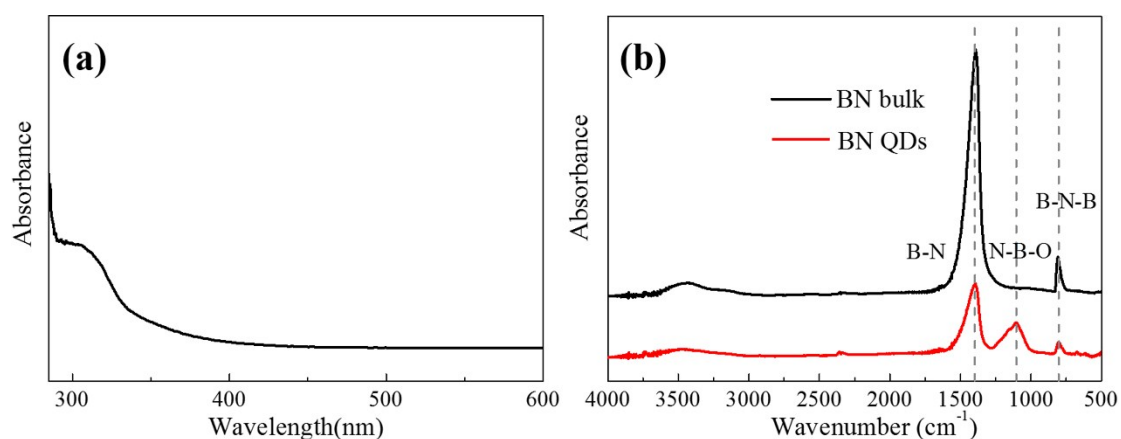

**Fig. S5** UV-vis spectrum of the BN QDs and FTIR spectra of the bulk BN flakes and BN QDs.

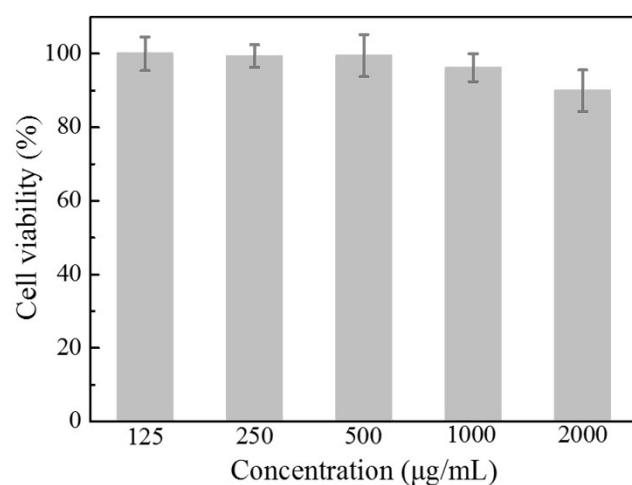

**Fig. S6** Cell viability assay with HEK 293T cells treated with different concentrations of BN QDs.

**Table S2** A summary of cell viabilities of different fluorescent QDs after 24 h.

| Samples              | Concentrations | Cell viabilities (normal human cells) |
|----------------------|----------------|---------------------------------------|
| CdTe QDs             | 0.072 ug/ml    | 25 % <sup>1</sup>                     |
| CQDs                 | 1720 ug/ml     | 82 % <sup>2</sup>                     |
| MoS <sub>2</sub> QDs | 200 ug/ml      | 90 % <sup>3</sup>                     |
| MoS <sub>2</sub> QDs | 2000 ug/ml     | 81 % <sup>4</sup>                     |
| WS <sub>2</sub> QDs  | 2000 ug/ml     | 83 % <sup>4</sup>                     |
| BN QDs               | 2000 ug/ml     | 90 % (current work)                   |

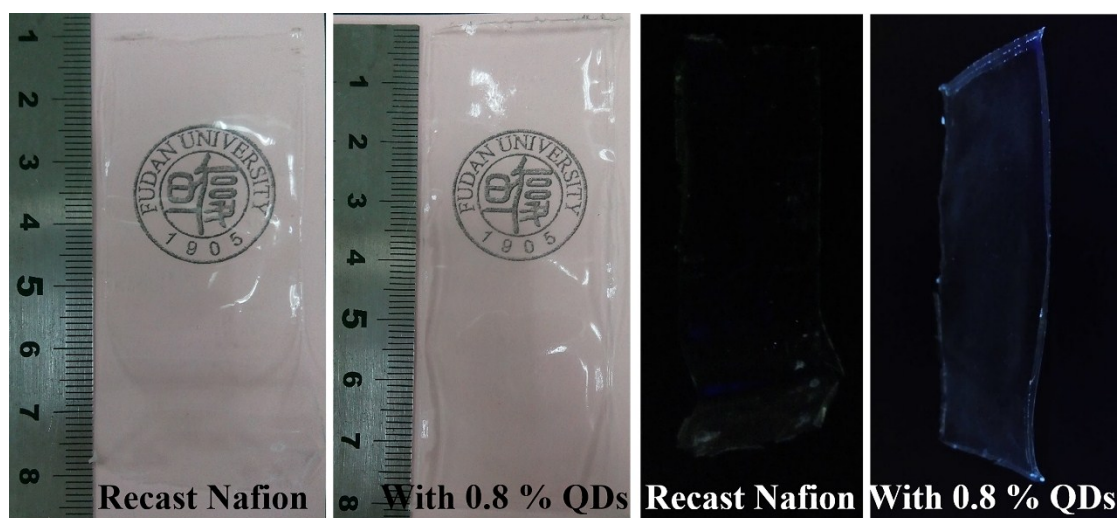

**Fig. S7** Digital photographs of the as-prepared PEMs under visible light (left) and under 365 nm UV irradiation (right).

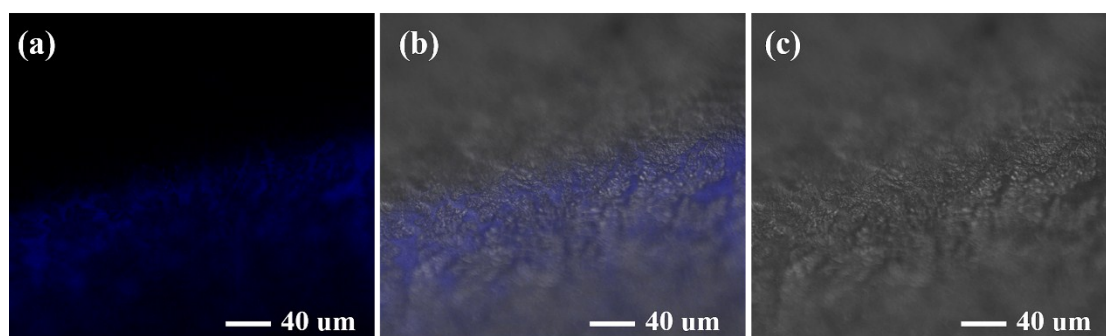

**Fig. S8** (a) The CLSM image of labeled Nafion membrane with 0.8 wt% BN QDs, (b) the overlapped image of the darkfield image and brightfield image, (c) the corresponding brightfield image.

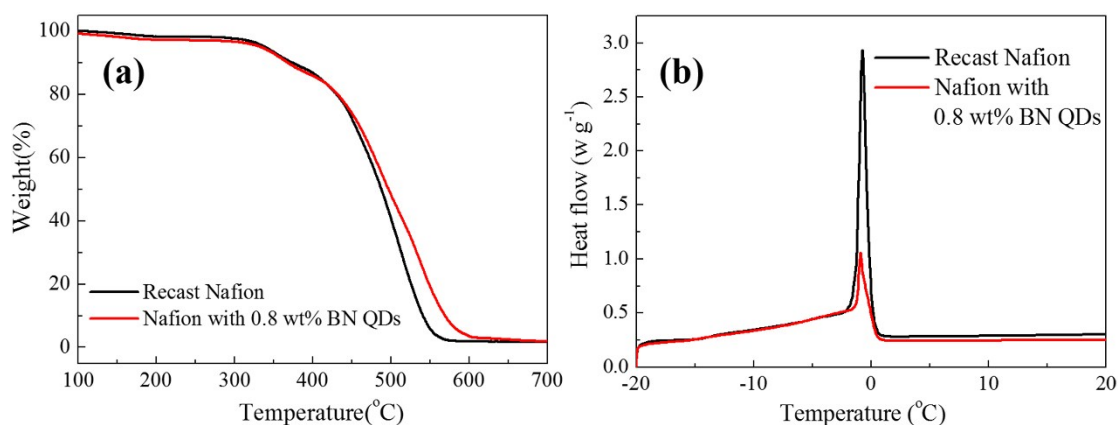

**Fig. S9** TGA (a) and DSC (b) curves of the recast Nafion and 0.8 wt% BN QDs/Nafion.

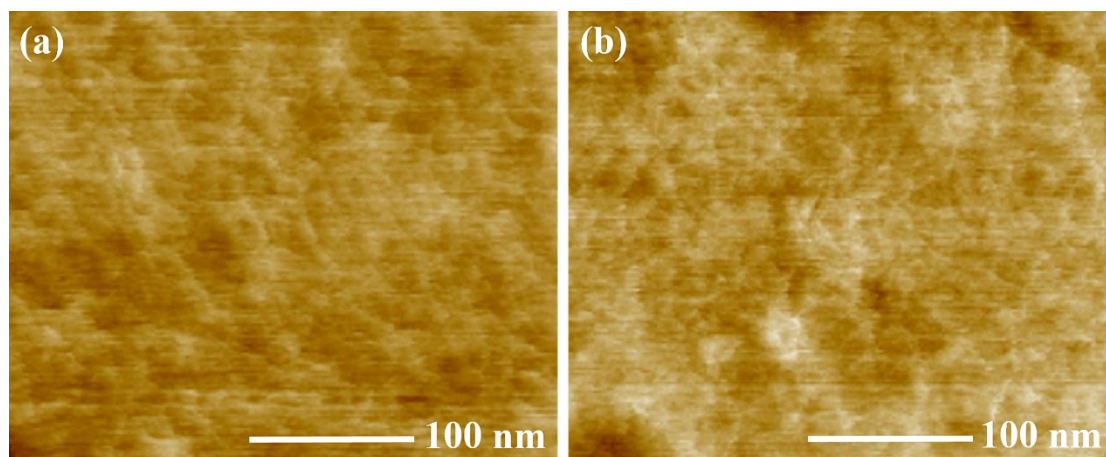

**Fig. S10** Typical AFM images of recast Nafion (a) and the Nafion membrane with 0.8 wt% BN QDs (b).

## Notes and references

1. N. Chen, Y. He, Y. Su, X. Li, Q. Huang, H. Wang, X. Zhang, R. Tai and C. Fan, *Biomaterials*, 2012, **33**, 1238-1244.
2. P.-C. Hsu and H.-T. Chang, *Chem. Commun.*, 2012, **48**, 3984-3986.
3. W. Dai, H. Dong, B. Fugetsu, Y. Cao, H. Lu, X. Ma and X. Zhang, *Small*, 2015, DOI: 10.1002/smll.201500208.
4. S. Xu, D. Li and P. Wu, *Adv. Funct. Mater.*, 2015, **25**, 1127-1136.
